# Supplementary material for: Effector Genomics Accelerates Discovery and Functional Profiling of Potato Disease Resistance and Phytophthora Infestans Avirulence Genes
Source: PubMed Central journal article supplement (PMC2483939; doi:10.1371/journal.pone.0002875), 2008-08-06
Supplement: pone.0002875.s002.pdf [file pone.0002875.s002.pdf]

## Figure S2

Co-expression of *Rpi-blb1* with *lpiO1*, *lpiO2* and *lpiO4*.

Leaves of *N. benthamiana* were infiltrated with equal mixtures of *A. tumefaciens* strain AGL1 containing pK7-*lpiO1*, -*lpiO2*, and -*lpiO4* with *A. tumefaciens* strain AGL1 containing pBINPLUS-*Rpi-blb1* under its native regulatory elements. A specific HR occurs when *Rpi-blb1* is co-expressed with *lpiO1* and *lpiO2*, but not with *lpiO4*. Co-infiltrations of *lpiO1*, *lpiO2*, and *lpiO4* with *Rpi-sto1* and *Rpi-pta1* resulted in identical outcomes. Pictures were taken at 5 dpi.
